# Supplementary material
Source: PubMed Central journal article supplement (PMC5710577)

## Supplementary Online Content

Joubert B, Chapelon-Abric C, Biard L, et al. Association of prognostic factors and immunosuppressive treatment with long-term outcomes in neurosarcoidosis. *JAMA Neurol*. Published online October 9, 2017. doi:10.1001/jamaneurol.2017.2492

**eTable 1.** Extraneurologic Characteristics of 234 Patients With NS

**eTable 2.** Overall and Relapse-Free Survival 1990-1999 (n = 55)

**eTable 3.** Overall and Relapse-Free Survival 2000-2015 (n = 179)

**eTable 4.** Factors Associated With the Risk for Neurologic and Nonneurologic Relapse in Patients With Neurosarcoidosis

**eTable 5.** Functional Outcomes at 60 Months 1990-1999 (n = 55)

**eTable 6.** Functional Outcomes at 60 Months 2000-2015 (n = 179)

**eFigure.** Overall and Relapse-Free Survival According to the Period of Neurosarcoidosis Diagnosis

This supplementary material has been provided by the authors to give readers additional information about their work.

**eTable 1. Extraneurologic Characteristics of 234 Patients With NS**

| Characteristic                    | No. (%) of Patients |
|-----------------------------------|---------------------|
| No. of sites                      |                     |
| 0                                 | 18/234 (7.8)        |
| 1                                 | 52/234 (22.2)       |
| 2                                 | 68/234 (29.1)       |
| 3                                 | 41/234 (17.5)       |
| ≥4                                | 55/234 (23.5)       |
| Abnormal chest radiograph finding | 162/234 (69.2)      |
| Heart                             | 84/194 (43.3)       |
| General symptoms                  | 82/234 (35.0)       |
| Eye                               | 67/234 (28.6)       |
| Lymph node                        | 67/234 (28.6)       |
| Cutaneous and mucosal             | 49/234 (20.9)       |
| Liver or spleen                   | 41/234 (17.5)       |
| Joints                            | 36/234 (15.4)       |
| Exocrine                          | 35/234 (15.0)       |
| Ear, nose, and throat             | 16/234 (6.8)        |
| Kidney                            | 7/234 (3.0)         |
| Digestive tract                   | 7/234 (3.0)         |
| Bones                             | 5/234 (2.1)         |
| Elevated serum ACE level          | 85/172 (49.4)       |
| Elevated CSF ACE level            | 42/55 (76.4)        |
| Pathologic gallium scintigraphy   | 55/66 (83.3)        |

Abbreviations: ACE, angiotensin-converting enzyme; CSF, cerebrospinal fluid; NS, neurosarcoidosis.

**eTable 2. Overall and Relapse-Free Survival 1990-1999 (n=55)**

| Variable                                     | Overall survival |                     |         | Relapse-free survival |                     |         |
|----------------------------------------------|------------------|---------------------|---------|-----------------------|---------------------|---------|
|                                              | Deaths /patients | HR (95% CI)         | P Value | Relapses/patients     | HR (95% CI)         | P Value |
| <b>General features</b>                      |                  |                     |         |                       |                     |         |
| EDSS at baseline (HR per point)              | -                | 1.37 (1.02 ; 1.84)  | .035    | -                     | 0.94 (0.84 ; 1.06)  | .33     |
| Age at NS diagnosis (HR per 10 years)        | -                | 1.87 (0.94 ; 3.72)  | .076    | -                     | 1.03 (0.77 ; 1.37)  | .86     |
| Male gender                                  | 2/29             | 0.28 (0.029 ; 2.65) | .26     | 19/23                 | 0.61 (0.31 ; 1.20)  | .15     |
| Ethnic Background                            |                  |                     |         |                       |                     |         |
| Caucasian                                    | 3/29             | 1                   |         | 19/21                 | 1                   |         |
| African / Caribbean                          | 1/16             | 0.53 (0.05 ; 5.15)  | .58     | 11/13                 | 0.55 (0.23 ; 1.27)  | .16     |
| North African/other                          | 1/10             | 1.14 (0.11 ; 11.6)  | .91     | 7/9                   | 1.01 (0.42 ; 2.42)  | .98     |
| Smoking                                      | 1/11             | 1.31 (0.14 ; 12.6)  | .82     | 8/8                   | 1.49 (0.66 ; 3.35)  | .34     |
| Sarcoidosis classification*                  |                  |                     |         |                       |                     |         |
| Definite                                     | 1/9              | 1                   |         | 7/7                   | 1                   |         |
| Probable or possible                         | 4/46             | 0.51 (0.05 to 4.90) | .56     | 29/36                 | 1.11 (0.48 to 2.56) | .81     |
| Biopsy-proven sarcoidosis                    | 4/43             | 0.89 (0.09 ; 8.57)  | .92     | 28/34                 | 0.40 (0.17 ; 0.95)  | .039    |
| <b>Extra-neurological involvement</b>        |                  |                     |         |                       |                     |         |
| > 3 non-neurological sites involved          | 1/18             | 0.58 (0.06 ; 5.58)  | .64     | 14/15                 | 1.26 (0.64 ; 2.51)  | .50     |
| Abnormal chest radiography                   | 4/42             | 1.01 (0.10 ; 9.69)  | .99     | 28/33                 | 1.16 (0.52 ; 2.57)  | .72     |
| Heart                                        | 0/14             |                     | .18     | 9/10                  | 1.71 (0.74 ; 3.94)  | .21     |
| General symptoms                             | 1/15             | 0.44 (0.048 ; 3.98) | .46     | 11/13                 | 1.06 (0.49 ; 2.30)  | .88     |
| Eye                                          | 1/14             | 0.61 (0.06 ; 5.82)  | .67     | 10/11                 | 1.67 (0.78 ; 3.56)  | .19     |
| Lymph nodes                                  | 3/18             | 6.95 (0.72 ; 66.8)  | .093    | 15/16                 | 1.97 (0.96 ; 4.07)  | .066    |
| Cutaneous and mucosal                        | 2/15             | 1.38 (0.22 ; 8.52)  | .73     | 12/13                 | 0.91 (0.45 ; 1.84)  | .80     |
| Liver or spleen                              | 1/12             | 0.59 (0.06 ; 5.54)  | .64     | 11/11                 | 1.16 (0.57 ; 2.39)  | .68     |
| Joints                                       | 0/10             |                     | .30‡    | 7/9                   | 0.73 (0.32 ; 1.69)  | .46     |
| Exocrine glands                              | 0/14             | 0.93 (0.10 ; 8.96)  | .95     | 9/9                   | 0.92 (0.42 ; 2.01)  | .84     |
| Ear, nose and throat                         | 0/5              | -                   | .48‡    | 3/4                   | 1.65 (0.49 ; 5.56)  | .42     |
| Kidney                                       | 0/2              | -                   | .66‡    | 2/2                   | 0.61 (0.14 ; 2.74)  | .52     |
| Digestive tract                              | 1/2              | 7.09 (0.74 ; 68.2)  | .09     | 2/2                   | 0.77 (0.18 ; 3.34)  | .73     |
| Bones                                        | 0/2              | -                   | .66‡    | 1/1                   | 1.06 (0.14 ; 7.84)  | .96     |
| <b>Neurological Involvement</b>              |                  |                     |         |                       |                     |         |
| Encephalon                                   | 4/38             | 1.52 (0.16 ; 14.6)  | .72     | 25/30                 | 2.22 (1.03 ; 4.79)  | .04     |
| Myelopathy                                   | 2/19             | 1.05 (0.17 ; 6.36)  | .96     | 10/13                 | 0.87 (0.41 ; 1.84)  | .72     |
| Cranial nerve                                | 2/22             | 1.64 (0.23 ; 11.6)  | .62     | 16/18                 | 1.02 (0.50 ; 2.07)  | .96     |
| Peripheral nervous system                    | 2/9              | 2.30 (0.35 ; 15.0)  | .38     | 7/8                   | 1.03 (0.44 ; 2.41)  | .94     |
| Myopathy                                     | 1/4              | 5.13 (0.53 ; 49.5)  | .16     | 4/4                   | 2.89 (0.98 ; 8.51)  | .054    |
| Abnormal brain or spinal cord MRI            | 2/33             | 0.07 (0.005 ; 1.19) | .07     | 23/28                 | 1.67 (0.37 ; 7.48)  | .50     |
| CSF protein level > 50 mg/dL                 | 4/24             |                     | .04‡    | 18/20                 | 0.56 (0.26 ; 1.23)  | .15     |
| CSF white blood cells > 5/mm <sup>3</sup>    | 2/28             | 0.71 (0.10 ; 5.08)  | .73     | 19/24                 | 1.21 (0.55 ; 2.64)  | .63     |
| Elevated serum angiotensin-converting enzyme | 3/25             | 3.05 (0.32 ; 29.3)  | .33     | 16/20                 | 0.87 (0.41 ; 1.84)  | .72     |

‡P-value of Log Rank Test

**eTable 3. Overall and Relapse-Free Survival 2000-2015 (n=179)**

| Variable                                     | Overall survival |                     |         | Relapse-free survival |                     |         |
|----------------------------------------------|------------------|---------------------|---------|-----------------------|---------------------|---------|
|                                              | Deaths /patients | HR (95% CI)         | P Value | Relapses/patients     | HR (95% CI)         | P Value |
| <b>General features</b>                      |                  |                     |         |                       |                     |         |
| EDSS at baseline (HR per point)              | -                | 1.19 (1.02 ; 1.38)  | .03     | -                     | 1.00 (0.94 ; 1.07)  | .90     |
| Age at NS diagnosis (HR per 10 years)        | -                | 1.35 (0.98 ; 1.88)  | .07     | -                     | 0.89 (0.78 ; 1.02)  | .10     |
| Male gender                                  | 10/88            | 1.70 (0.62 ; 4.68)  | .30     | 45/74                 | 1.03 (0.69 ; 1.54)  | .88     |
| Ethnic Background                            |                  |                     |         |                       |                     |         |
| Caucasian                                    | 10/96            | 1                   |         | 57/81                 | 1                   |         |
| African / Caribbean                          | 5/42             | 1.28 (0.44 ; 3.75)  | .65     | 22/35                 | 0.74 (0.45 ; 1.22)  | .24     |
| North African/other                          | 1/41             | 0.32 (0.040 ; 2.47) | .27     | 21/35                 | 1.02 (0.62 ; 1.69)  | .93     |
| Smoking                                      | 4/43             | 0.83 (0.27 ; 2.59)  | .75     | 31/41                 | 1.11 (0.72 ; 1.70)  | .64     |
| Sarcoidosis classification*                  |                  |                     |         |                       |                     |         |
| Definite                                     | 4/24             | 1                   |         | 16/24                 | 1                   |         |
| Probable or possible                         | 12/155           | 0.56 (0.18 to 1.73) | .31     | 84/127                | 0.76 (0.44 to 1.30) | .32     |
| Biopsy-proven sarcoidosis                    | 14/125           | 2.63 (0.60 ; 11.6)  | .20     | 71/107                | 0.85 (0.55 ; 1.32)  | .47     |
| <b>Extra-neurological involvement</b>        |                  |                     |         |                       |                     |         |
| > 3 non-neurological sites involved          | 2/37             | 0.46 (0.11 ; 2.04)  | .31     | 21/31                 | 0.98 (0.60 ; 1.59)  | .93     |
| Abnormal chest radiography                   | 3/29             | 1.00 (0.28 ; 3.53)  | >.99    | 72/104                | 0.95 (0.61 ; 1.48)  | .83     |
| Heart                                        | 5/70             | 0.68 (0.22 ; 2.08)  | .50     | 43/62                 | 1.09 (0.72 ; 1.65)  | .69     |
| General symptoms                             | 6/67             | 0.95 (0.35 ; 2.63)  | .93     | 42/54                 | 1.17 (0.79 ; 1.74)  | .44     |
| Eye                                          | 3/53             | 0.49 (0.14 ; 1.71)  | .26     | 32/42                 | 1.05 (0.69 ; 1.61)  | .81     |
| Lymph nodes                                  | 6/49             | 1.49 (0.54 ; 4.10)  | .44     | 32/43                 | 1.37 (0.90 ; 2.10)  | .14     |
| Cutaneous and mucosal                        | 1/34             | 0.28 (0.037 ; 2.14) | .22     | 15/27                 | 0.69 (0.40 ; 1.20)  | .19     |
| Liver or spleen                              | 3/29             | 1.00 (0.28 ; 3.53)  | >.99    | 17/26                 | 1.02 (0.61 ; 1.73)  | .93     |
| Joints                                       | 1/26             | 0.37 (0.049 ; 2.80) | .33     | 16/20                 | 1.09 (0.64 ; 1.87)  | .76     |
| Exocrine glands                              | 3/23             | 1.52 (0.43 ; 5.34)  | .51     | 13/19                 | 0.87 (0.48 ; 1.57)  | .65     |
| Ear, nose and throat                         | 0/11             | -                   | .33‡    | 5/7                   | 2.07 (0.83 ; 5.16)  | .12     |
| Kidney                                       | 0/5              | -                   | .45‡    | 4/5                   | 3.41 (1.24 ; 9.40)  | .02     |
| Digestive tract                              | 0/5              | -                   | .44‡    | 3/5                   | 0.99 (0.31 ; 3.13)  | .98     |
| Bones                                        | 0/3              | -                   | .56‡    | 2/3                   | 0.83 (0.20 ; 3.38)  | .79     |
| <b>Neurological Involvement</b>              |                  |                     |         |                       |                     |         |
| Encephalon                                   | 10/105           | 1.12 (0.41 ; 3.08)  | .83     | 65/87                 | 1.79 (1.17 ; 2.74)  | .008    |
| Myelopathy                                   | 4/43             | 0.92 (0.30 ; 2.87)  | .89     | 23/35                 | 0.82 (0.51 ; 1.31)  | .41     |
| Cranial nerve                                | 4/64             | 0.54 (0.17 ; 1.68)  | .29     | 41/54                 | 1.03 (0.69 ; 1.56)  | .87     |
| Peripheral nervous system                    | 5/15             | 5.47 (1.89 ; 15.8)  | .002    | 12/14                 | 1.68 (0.91 ; 3.09)  | .10     |
| Myopathy                                     | 2/15             | 1.72 (0.39 ; 7.57)  | .48     | 9/14                  | 1.26 (0.63 ; 2.52)  | .51     |
| Abnormal brain or spinal cord MRI            | 11/121           |                     | .32‡    | 68/101                | 1.03 (0.41 ; 2.57)  | .94     |
| CSF protein level > 50 mg/dL                 | 10/93            | 2.64 (0.58 ; 12.0)  | .21     | 58/79                 | 1.47 (0.92 ; 2.35)  | .11     |
| CSF white blood cells > 5/mm <sup>3</sup>    | 9/91             | 2.06 (0.56 ; 7.63)  | .28     | 53/72                 | 1.36 (0.87 ; 2.14)  | .18     |
| Elevated serum angiotensin-converting enzyme | 8/60             | 1.74 (0.57 ; 5.33)  | .33     | 32/53                 | 0.87 (0.54 ; 1.40)  | .56     |

‡P-value of Log Rank Test

**eTable 4. Factors Associated With the Risk for Neurologic and Nonneurologic Relapse in Patients With Neurosarcoidosis**

| Variable                              | Neurological relapse   |                     |                 | Non-neurological relapse           |                     |         |
|---------------------------------------|------------------------|---------------------|-----------------|------------------------------------|---------------------|---------|
|                                       | Neurological /patients | HR (95% CI)*        | P Value         | Non-neurological relapses/patients | HR (95% CI)*        | P Value |
| <b>General features</b>               |                        |                     |                 |                                    |                     |         |
| EDSS at baseline (HR per point)       | -                      | 0.99 (0.93 to 1.07) | .84             | -                                  | 0.91 (0.78 to 1.05) | .19     |
| Age at NS diagnosis (HR per 10 years) | -                      | 0.82 (0.70 to 0.97) | <b>.02</b>      | -                                  | 0.97 (0.72 to 1.29) | .81     |
| Male gender                           | 43/97                  | 1.04 (0.68 to 1.59) | .86             | 11/97                              | 0.54 (0.23 to 1.27) | .16     |
| Ethnic Background                     |                        |                     |                 |                                    |                     |         |
| Caucasian                             | 52/102                 | 1                   |                 | 14/102                             | 1                   |         |
| African / Caribbean                   | 20/48                  | 0.72 (0.43 to 1.20) | .21             | 5/48                               | 0.34 (0.10 to 1.21) | .10     |
| North African/other                   | 16/44                  | 0.82 (0.47 to 1.44) | .49             | 8/44                               | 1.51 (0.63 to 3.61) | .35     |
| Smoking                               | 24/49                  | 1.06 (0.66 to 1.70) | .81             | 8/49                               | 1.36 (0.58 to 3.20) | .48     |
| Sarcoidosis classification*           |                        |                     |                 |                                    |                     |         |
| Definite                              | 14/31                  | 1                   |                 | 6/31                               | 1                   |         |
| Probable or possible                  | 74/163                 | 0.90 (0.50 to 1.59) | .71             | 21/163                             | 0.63 (0.24 to 1.62) | .33     |
| Biopsy-proven sarcoidosis             | 61/141                 | 0.70 (0.44 to 1.11) | .13             | 22/141                             | 1.07 (0.39 to 2.92) | .89     |
| <b>Extra-neurological involvement</b> |                        |                     |                 |                                    |                     |         |
| > 3 non-neurological sites involved   | 22/46                  | 1.02 (0.63 to 1.67) | .92             | 10/46                              | 1.98 (0.89 to 4.45) | .10     |
| Abnormal chest radiography            | 63/137                 | 0.91 (0.57 to 1.46) | .70             | 20/137                             | 1.00 (0.41 to 2.41) | >.99    |
| Heart                                 | 36/72                  | 1.13 (0.72 to 1.77) | .61             | 11/72                              | 1.77 (0.72 to 4.38) | .21     |
| General symptoms                      | 39/67                  | 1.43 (0.94 to 2.19) | .10             | 8/67                               | 0.87 (0.37 to 2.02) | .74     |
| Eye                                   | 25/53                  | 0.97 (0.61 to 1.55) | .91             | 10/53                              | 1.80 (0.80 to 4.05) | .16     |
| Lymph nodes                           | 29/59                  | 1.28 (0.82 to 2.01) | .28             | 10/59                              | 2.24 (0.97 to 5.21) | .06     |
| Cutaneous and mucosal                 | 16/40                  | 0.71 (0.41 to 1.23) | .22             | 8/40                               | 1.41 (0.60 to 3.31) | .43     |
| Liver or spleen                       | 15/37                  | 0.89 (0.51 to 1.55) | .67             | 9/37                               | 2.08 (0.91 to 4.76) | .08     |
| Joints                                | 15/29                  | 1.04 (0.59 to 1.82) | .89             | 8/29                               | 1.93 (0.82 to 4.54) | .13     |
| Exocrine glands                       | 10/28                  | 0.64 (0.33 to 1.24) | .18             | 7/28                               | 1.60 (0.65 to 3.96) | .31     |
| Ear, nose and throat                  | 6/11                   | 1.92 (0.82 to 4.47) | .13             | 2/11                               | 3.02 (0.68 to 13.5) | .15     |
| Kidney                                | 3/7                    | 1.60 (0.50 to 5.15) | .43             | 3/7                                | 3.41 (0.84 to 13.9) | .09     |
| Digestive tract                       | 2/7                    | 0.63 (0.15 to 2.55) | .51             | 2/7                                | 1.89 (0.43 to 8.27) | .40     |
| Bones                                 | 2/4                    | 0.90 (0.22 to 3.68) | .88             | 1/4                                | 1.60 (0.21 to 12.1) | .65     |
| <b>Neurological Involvement</b>       |                        |                     |                 |                                    |                     |         |
| CNS localization                      | 70/140                 | 1.80 (1.06 to 3.06) | <b>.03</b>      | 16/140                             | 0.82 (0.36 to 1.85) | .63     |
| Encephalon                            | 64/117                 | 2.35 (1.44 to 3.83) | <b>&lt;.001</b> | 13/117                             | 0.94 (0.43 to 2.07) | .87     |
| Myelopathy                            | 21/48                  | 0.82 (0.50 to 1.35) | .43             | 5/48                               | 0.65 (0.24 to 1.73) | .39     |
| Cranial nerve                         | 38/72                  | 1.20 (0.78 to 1.85) | .40             | 12/72                              | 1.01 (0.45 to 2.26) | .98     |
| Peripheral nervous                    | 11/22                  | 1.20 (0.63 to 2.30) | .58             | 4/22                               | 1.93 (0.64 to 5.83) | .24     |

| system                                       |        |                     |     |        |                     |      |
|----------------------------------------------|--------|---------------------|-----|--------|---------------------|------|
| Myopathy                                     | 9/18   | 1.47 (0.73 to 2.94) | .28 | 0/18   | -                   | .19‡ |
| Abnormal brain or spinal cord MRI            | 65/129 | 1.37 (0.50 to 3.77) | .54 | 16/129 | 1.34 (0.17 to 10.3) | .78  |
| CSF protein level > 50 mg/dL                 | 54/99  | 1.36 (0.84 to 2.21) | .21 | 12/99  | 0.79 (0.31 to 2.00) | .62  |
| CSF white blood cells > 5/mm <sup>3</sup>    | 52/96  | 1.45 (0.90 to 2.32) | .13 | 7/96   | 0.66 (0.26 to 1.63) | .36  |
| Elevated serum angiotensin-converting enzyme | 28/73  | 0.73 (0.45 to 1.19) | .21 | 7/73   | 0.72 (0.26 to 1.96) | .52  |

\* Cause-specific hazards ratios (neurological relapse, non-neurological relapse, relapse with unavailable localization, death as mutually competing risks)

‡P-value of Log-Rank test, stratified on time period (NS diagnosis in 1990-1999 versus 2000-2015); Estimation of hazards ratio using a Cox regression model was not performed due to the absence of non-neurological relapse in patients with myopathy

**eTable 5. Functional Outcomes at 60 Months 1990-1999 (n=55)**

| Variable                                  | EDSS ≥ 2.5   |                            |                      |         | Changes in EDSS from baseline to month 60 |                 |                  |         |
|-------------------------------------------|--------------|----------------------------|----------------------|---------|-------------------------------------------|-----------------|------------------|---------|
|                                           | Total number | Number (%) with EDSS ≥ 2.5 | OR (95%CI)           | P Value | Improvement Δ ≤ -1                        | Stability Δ = 0 | Worsening Δ ≥ +1 | P Value |
| Total                                     | 52           | 18 (35)                    | -                    | -       | 17 (33)                                   | 32 (62)         | 3 (6)            | -       |
| <b>General Features</b>                   |              |                            |                      |         |                                           |                 |                  |         |
| EDSS at baseline (OR per point)           | 52           |                            | 1.86 (1.3 ; 2.65)    | .0007   | 2 (1 ; 5)                                 | 1 (0 ; 3)       | 2 (1 ; 2)        | .20     |
| Age at NS diagnosis (OR per 10 years)     | 52           | -                          | 0.84 (0.43 ; 1.64)   | .61     | 39 (27 ; 44)                              | 36 (29 ; 44)    | 35 (32 ; 36)     | .82     |
| Male                                      | 29           | 11 (38)                    | 2.44 (0.49 ; 12.27)  | .28     | 9 (53)                                    | 19 (59)         | 1 (33)           | .73     |
| Ethnic background                         |              |                            |                      |         |                                           |                 |                  | .47     |
| Caucasian                                 | 28           | 12 (43)                    | 1                    |         | 7 (41)                                    | 19 (59)         | 2 (67)           |         |
| African / Caribbean                       | 15           | 4 (27)                     | 0.34 (0.05 ; 2.29)   | .27     | 7 (41)                                    | 8 (25)          | 0 (0)            |         |
| North African / other                     | 9            | 2 (22)                     | 0.32 (0.03 ; 3.00)   | .32     | 3 (18)                                    | 5 (16)          | 1 (33)           |         |
| Smoking                                   | 11           | 4 (36)                     | 1.46 (0.28 ; 7.59)   | .65     | 3 (19)                                    | 8 (25)          | 0 (0)            | .87     |
| Sarcoidosis classification *              |              |                            |                      |         |                                           |                 |                  | .65     |
| Definite                                  | 8            | 2 (25)                     | 1                    |         | 4 (24)                                    | 4 (12)          | 0 (0)            |         |
| Probable or possible                      | 44           | 16 (36)                    | 4.17 (0.3 ; 57.27)   | .29     | 13 (76)                                   | 28 (88)         | 3 (100)          |         |
| Biopsy-proven sarcoidosis                 | 40           | 14 (35)                    | 0.78 (0.14 ; 4.26)   | .78     | 16 (94)                                   | 22 (69)         | 2 (67)           | .07     |
| <b>Extra-neurological involvement</b>     |              |                            |                      |         |                                           |                 |                  |         |
| > 3 non-neurological sites involved       | 18           | 4 (22)                     | 0.14 (0.01 ; 1.26)   | .08     | 6 (35)                                    | 11 (34)         | 1 (33)           | >.99    |
| Abnormal chest X ray                      | 40           | 15 (38)                    | 0.9 (0.15 ; 5.55)    | .91     | 16 (94)                                   | 21 (66)         | 3 (100)          | .06     |
| Heart                                     | 14           | 4 (29)                     | 0.31 (0.05 ; 2.18)   | .24     | 6 (43)                                    | 8 (35)          | 0 (0)            | .65     |
| General symptoms                          | 15           | 2 (13)                     | 0.61 (0.1 ; 3.61)    | .58     | 5 (29)                                    | 9 (28)          | 1 (33)           | >.99    |
| Eye                                       | 12           | 5 (42)                     | 2.15 (0.4 ; 11.46)   | .37     | 2 (12)                                    | 8 (25)          | 2 (67)           | .13     |
| Lymph node                                | 16           | 6 (38)                     | 0.29 (0.04 ; 2.12)   | .22     | 7 (41)                                    | 8 (25)          | 1 (33)           | .54     |
| Cutaneous and mucosal                     | 15           | 4 (27)                     | 0.25 (0.03 ; 1.89)   | .18     | 5 (29)                                    | 10 (31)         | 0 (0)            | .78     |
| Liver or spleen                           | 12           | 4 (33)                     | 1.78 (0.35 ; 9.15)   | .49     | 3 (18)                                    | 8 (25)          | 1 (33)           | .76     |
| Exocrine                                  | 12           | 4 (33)                     | 1.9 (0.36 ; 10.1)    | .45     | 2 (12)                                    | 9 (28)          | 1 (33)           | .38     |
| Joints                                    | 10           | 3 (30)                     | 1.59 (0.25 ; 10.09)  | .62     | 3 (18)                                    | 6 (19)          | 1 (33)           | .72     |
| Ear, nose and throat                      | 5            | 0 (0)                      |                      | .15‡    | 2 (12)                                    | 3 (9)           | 0 (0)            | >.99    |
| Kidney                                    | 2            | 0 (0)                      |                      | .54‡    | 1 (6)                                     | 1 (3)           | 0 (0)            | >.99    |
| Digestive tract                           | 2            | 1 (50)                     |                      | >.99‡   | 0 (0)                                     | 2 (6)           | 0 (0)            | .59     |
| Bone                                      | 2            | 0 (0)                      |                      | .54‡    | 1 (6)                                     | 1 (3)           | 0 (0)            | >.99    |
| Elevated serum ACE                        | 24           | 12 (50)                    | 5.37 (0.9 ; 31.96)   | .07     | 8 (57)                                    | 14 (50)         | 2 (67)           | .90     |
| <b>Neurological Involvement</b>           |              |                            |                      |         |                                           |                 |                  |         |
| Encephalon                                | 35           | 13 (37)                    | 4.84 (0.56 ; 41.65)  | .15     | 10 (59)                                   | 22 (69)         | 3 (100)          | .50     |
| Spinal cord                               | 19           | 6 (32)                     | 0.59 (0.12 ; 2.87)   | .51     | 7 (41)                                    | 12 (38)         | 0 (0)            | .58     |
| Cranial nerve                             | 21           | 6 (29)                     | 0.46 (0.09 ; 2.29)   | .34     | 7 (41)                                    | 13 (41)         | 1 (33)           | >.99    |
| Peripheral nervous system                 | 9            | 3 (33)                     | 0.74 (0.1 ; 5.82)    | .78     | 2 (12)                                    | 6 (19)          | 1 (33)           | .47     |
| Muscle                                    | 4            | 2 (50)                     | 2.87 (0.22 ; 36.93)  | .42     | 2 (12)                                    | 1 (3)           | 1 (33)           | .08     |
| Abnormal brain or spinal cord MRI         | 32           | 12 (38)                    | 3.03 (0.06 ; 146.06) | .58     | 10 (91)                                   | 19 (95)         | 3 (100)          | >.99    |
| CSF protein level > 50 mg/dL              | 23           | 13 (57)                    | 1.51 (0.29 ; 7.71)   | .62     | 8 (57)                                    | 14 (56)         | 1 (33)           | .79     |
| CSF white blood cells > 5/mm <sup>3</sup> | 27           | 11 (41)                    | 0.87 (0.19 ; 3.99)   | .86     | 12 (86)                                   | 12 (48)         | 3 (100)          | .03     |

‡P-values of Fisher'

**eTable 6. Functional Outcomes at 60 Months 2000-2015 (n=179)**

| Variable                              | EDSS ≥ 2.5   |                            |                     |         | Changes in EDSS from baseline to month 60 |                 |                  |         |
|---------------------------------------|--------------|----------------------------|---------------------|---------|-------------------------------------------|-----------------|------------------|---------|
|                                       | Total number | Number (%) with EDSS ≥ 2.5 | OR (95%CI)          | P Value | Improvement Δ ≤ -1                        | Stability Δ = 0 | Worsening Δ ≥ +1 | P Value |
| Total                                 | 108          | 38 (35)                    | -                   | -       | 45 (42)                                   | 49 (45)         | 14 (13)          | -       |
| <b>General Features</b>               |              |                            |                     |         |                                           |                 |                  |         |
| EDSS at baseline (OR per point)       | 108          |                            | 1.8 (1.43 ; 2.27)   | <.001   | 4 (2 ; 8)                                 | 1 (0 ; 2)       | 1 (0 ; 2)        | <.001   |
| Age at NS diagnosis (OR per 10 years) | 108          | -                          | 0.71 (0.49 ; 1.04)  | .08     | 44 (37 ; 53)                              | 45 (33 ; 58)    | 32 (27 ; 48)     | .17     |
| Male                                  | 55           | 22 (40)                    | 0.99 (0.36 ; 2.76)  | .99     | 23 (51)                                   | 26 (53)         | 6 (43)           | .83     |
| Ethnic background                     |              |                            |                     |         |                                           |                 |                  | .79     |
| Caucasian                             | 66           | 22 (33)                    | 1                   |         | 26 (58)                                   | 29 (59)         | 11 (79)          |         |
| African / Caribbean                   | 27           | 11 (41)                    | 1.28 (0.4 ; 4.07)   | .67     | 12 (27)                                   | 13 (27)         | 2 (14)           |         |
| North African / other                 | 15           | 5 (33)                     | 0.67 (0.13 ; 3.57)  | .64     | 7 (16)                                    | 7 (14)          | 1 (7)            |         |
| Smoking                               | 30           | 16 (53)                    | 4.07 (1.34 ; 12.39) | .01     | 10 (22)                                   | 13 (28)         | 7 (50)           | .15     |
| Sarcoidosis classification *          |              |                            |                     |         |                                           |                 |                  | .33     |
| Definite                              | 17           | 9 (53)                     | 1                   |         | 9 (20)                                    | 5 (10)          | 3 (21)           |         |
| Probable or possible                  | 91           | 29 (32)                    | 0.59 (0.16 ; 2.18)  | .43     | 36 (80)                                   | 44 (90)         | 11 (79)          |         |
| Biopsy-proven sarcoidosis             | 77           | 25 (32)                    | 0.56 (0.19 ; 1.68)  | .30     | 31 (69)                                   | 37 (76)         | 9 (64)           | .58     |
| <b>Extra-neurological involvement</b> |              |                            |                     |         |                                           |                 |                  |         |
| > 3 non-neurological sites involved   | 28           | 6 (21)                     | 0.55 (0.17 ; 1.83)  | .33     | 10 (22)                                   | 14 (29)         | 4 (29)           | .79     |
| Abnormal chest X ray                  | 72           | 24 (33)                    | 0.65 (0.23 ; 1.86)  | .42     | 30 (67)                                   | 31 (63)         | 11 (79)          | .61     |
| Heart                                 | 43           | 16 (37)                    | 0.93 (0.32 ; 2.7)   | .89     | 16 (47)                                   | 20 (49)         | 7 (50)           | >.99    |
| General symptoms                      | 41           | 11 (27)                    | 0.68 (0.24 ; 1.94)  | .48     | 17 (38)                                   | 16 (33)         | 8 (57)           | .25     |
| Eye                                   | 37           | 9 (24)                     | 0.99 (0.33 ; 2.99)  | .99     | 11 (24)                                   | 20 (41)         | 6 (43)           | .19     |
| Lymph node                            | 33           | 9 (27)                     | 0.5 (0.15 ; 1.65)   | .26     | 9 (20)                                    | 19 (39)         | 5 (36)           | .14     |
| Cutaneous and mucosal                 | 20           | 6 (30)                     | 0.63 (0.17 ; 2.36)  | .49     | 7 (16)                                    | 12 (24)         | 1 (7)            | .31     |
| Liver or spleen                       | 20           | 4 (20)                     | 0.27 (0.06 ; 1.24)  | .09     | 8 (18)                                    | 10 (20)         | 2 (14)           | .94     |
| Exocrine                              | 15           | 4 (27)                     | 0.71 (0.16 ; 3.22)  | .66     | 6 (13)                                    | 7 (14)          | 2 (14)           | >.99    |
| Joints                                | 16           | 3 (19)                     | 0.2 (0.03 ; 1.22)   | .08     | 8 (18)                                    | 6 (12)          | 2 (14)           | .81     |
| Ear, nose and throat                  | 5            | 3 (60)                     | 8.98 (1.22 ; 66.26) | .03     | 1 (2)                                     | 2 (4)           | 2 (14)           | .20     |
| Kidney                                | 5            | 1 (20)                     | 0.75 (0.07 ; 7.66)  | .81     | 3 (7)                                     | 1 (2)           | 1 (7)            | .44     |
| Digestive tract                       | 4            | 0 (0)                      | -                   | .30‡    | 1 (2)                                     | 3 (6)           | 0 (0)            | .78     |
| Bone                                  | 2            | 0 (0)                      | -                   | .54‡    | 1 (2)                                     | 1 (2)           | 0 (0)            | >.99    |
| Elevated serum ACE                    | 40           | 11 (28)                    | 0.35 (0.1 ; 1.19)   | .09     | 20 (53)                                   | 17 (44)         | 3 (27)           | .33     |
| <b>Neurological Involvement</b>       |              |                            |                     |         |                                           |                 |                  |         |
| Encephalon                            | 64           | 25 (39)                    | 2.4 (0.8 ; 7.19)    | .12     | 25 (56)                                   | 26 (53)         | 13 (93)          | .02     |
| Spinal cord                           | 30           | 9 (30)                     | 0.78 (0.26 ; 2.4)   | .67     | 9 (20)                                    | 17 (35)         | 4 (29)           | .27     |
| Cranial nerve                         | 44           | 18 (41)                    | 1.81 (0.65 ; 5.04)  | .26     | 19 (42)                                   | 15 (31)         | 10 (71)          | .03     |
| Peripheral nervous system             | 7            | 5 (71)                     | 6.35 (0.9 ; 44.73)  | .06     | 3 (7)                                     | 0 (0)           | 4 (29)           | <.001   |
| Muscle                                | 8            | 3 (38)                     | 0.85 (0.13 ; 5.52)  | .86     | 4 (9)                                     | 4 (8)           | 0 (0)            | .77     |
| Abnormal brain or spinal cord MRI     | 70           | 31 (44)                    | 0.46 (0.08 ; 2.73)  | .39     | 31 (97)                                   | 28 (88)         | 11 (92)          | .38     |
| CSF protein level >                   | 58           | 31 (53)                    | 3.52 (1 ; 12.36)    | .049    | 22 (63)                                   | 24 (63)         | 12 (86)          | .26     |



|                                           |    |         |                    |     |         |         |         |     |
|-------------------------------------------|----|---------|--------------------|-----|---------|---------|---------|-----|
| 50 mg/dL                                  |    |         |                    |     |         |         |         |     |
| CSF white blood cells > 5/mm <sup>3</sup> | 52 | 28 (54) | 1.88 (0.61 ; 5.81) | .27 | 23 (66) | 19 (50) | 10 (71) | .28 |

‡P-values of Fisher' exact test



**eFigure. Overall and Relapse-Free Survival According to the Period of Neurosarcoidosis Diagnosis**

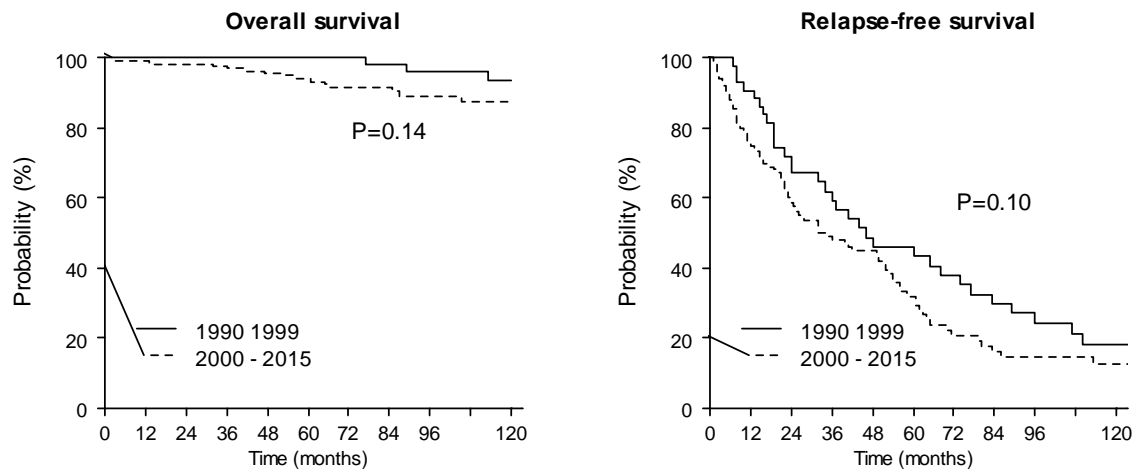

Supplement: jamaneurol-74-1336-s001.pdf [file jamaneurol-74-1336-s001.pdf]
